# Supplementary material for: A Poisson reduced-rank regression model for association mapping in sequencing data
Source: PubMed Central journal article supplement (PMC9733401; doi:10.1186/s12859-022-05054-6), 2022-12-08

nn-PRRR coefficients

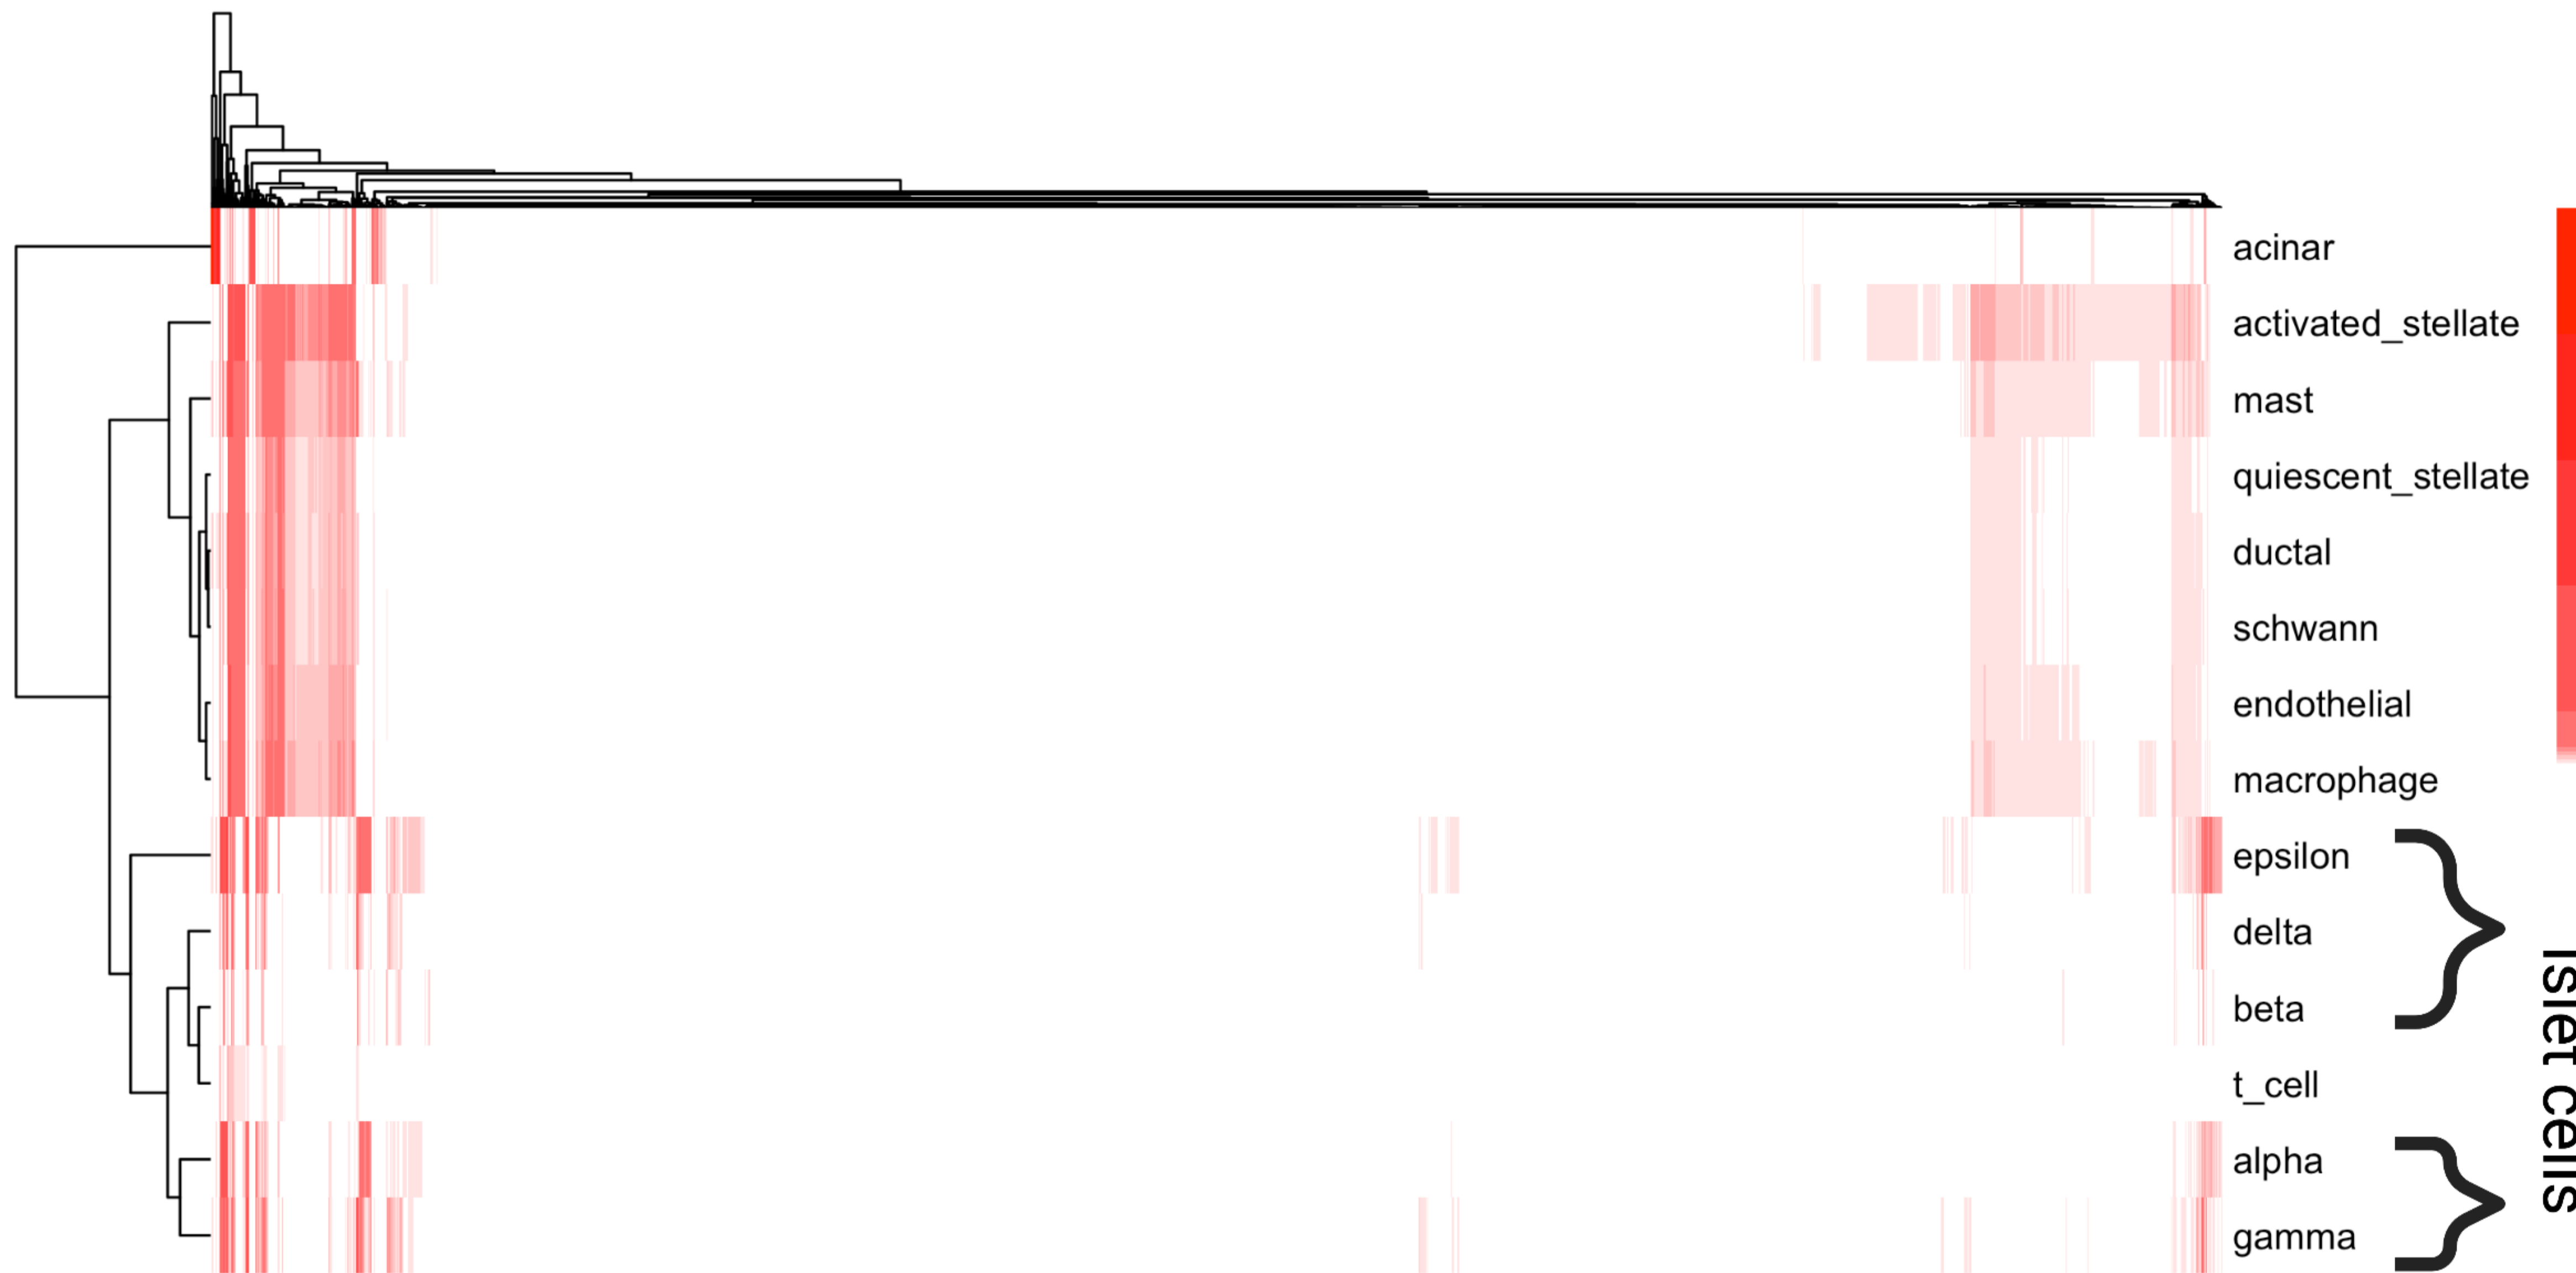

nn-PRRR coefficients

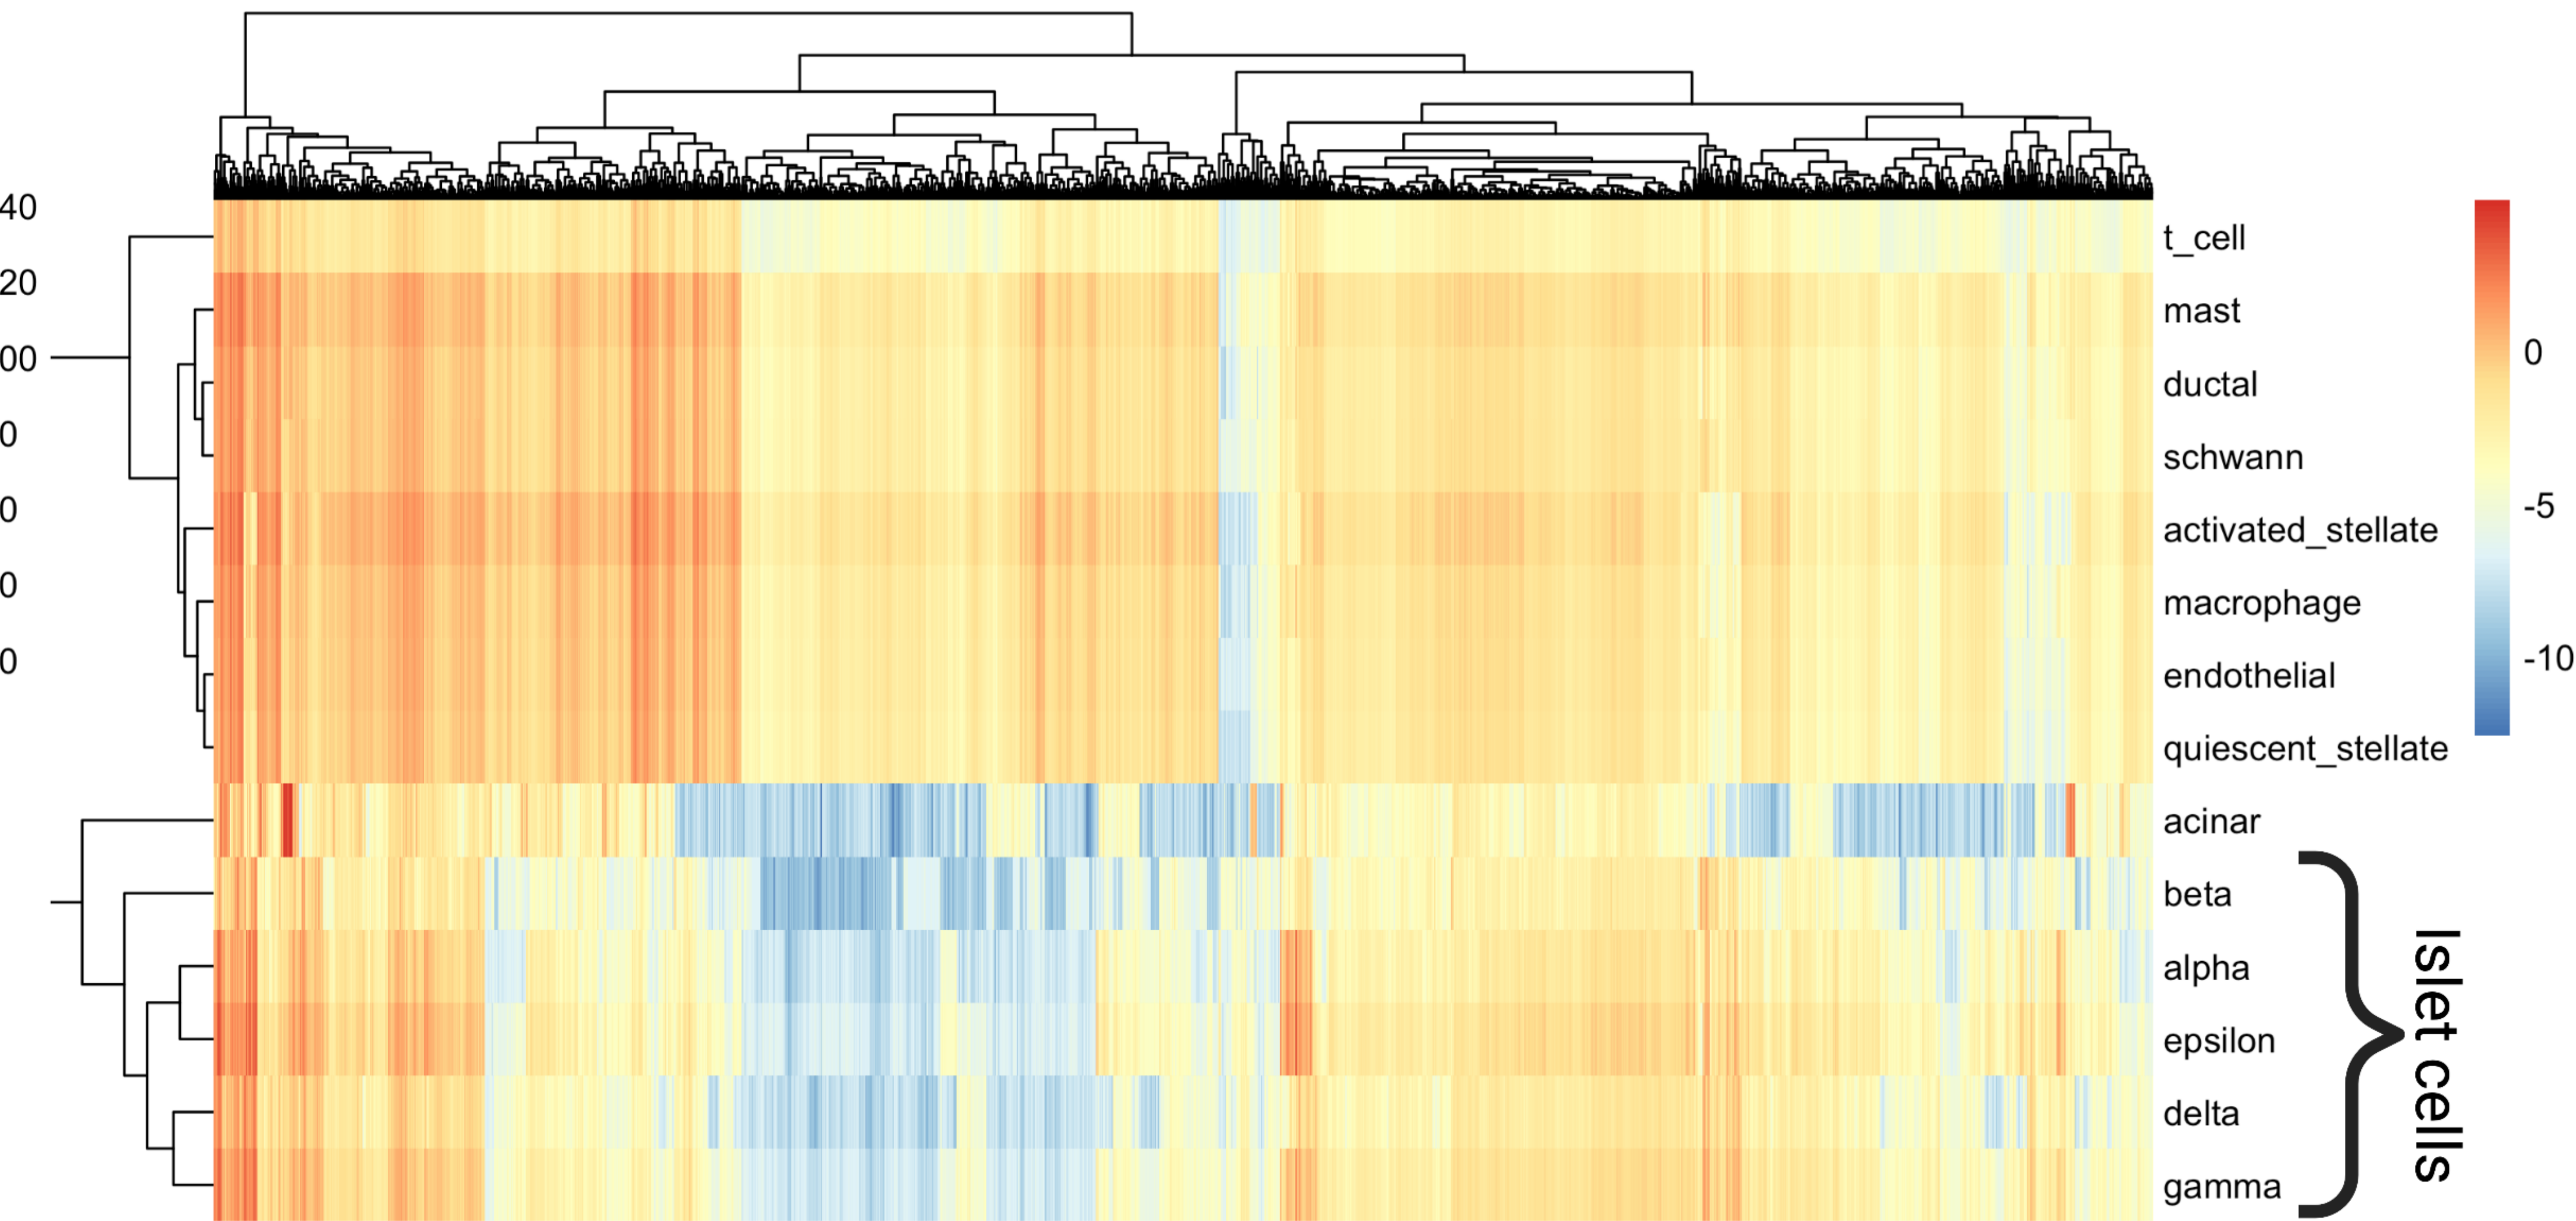

Supplement: 12859_2022_5054_MOESM3_ESM.pdf [file 12859_2022_5054_MOESM3_ESM.pdf]
